# Supplementary material for: Development of leafhopper cell culture to trace the early infection process of a nucleorhabdovirus, rice yellow stunt virus, in insect vector cells
Source: PubMed Central journal article supplement (PMC5910589; doi:10.1186/s12985-018-0987-6), 2018-04-20
Supplement: 12985_2018_987_MOESM1_ESM.pdf [file 12985_2018_987_MOESM1_ESM.pdf]

---

| Primer name     | Primer Sequence      |
|-----------------|----------------------|
| qPCR-RYSV-N-F   | AGTATGCCCAACTTGCCAGG |
| qPCR-RYSV-N-R   | CATTCGTTCAACCGGCATCC |
| qPCR-RYSV-P-F   | CTTAAACAGGGGTGGCAAGC |
| qPCR-RYSV-P-R   | TTGGGACGTTTTGCTCCAGT |
| qPCR-RYSV-M-F   | CCCGATCATGAAGCCACTAC |
| qPCR-RYSV-M-R   | CTTATTGTAGCACCCACCCC |
| qPCR-Nc-Actin-F | GGGATACAGTTTCACCACG  |
| qPCR-Nc-Actin-R | GACACCTGAATCGCTCGT   |

---
